# Supplementary material for: Self-reported Food Intolerance in Korean Patients With Irritable Bowel Syndrome
Source: PubMed Central journal article supplement — J Neurogastroenterol Motil. 2019 Apr 30;25(2):222–32. doi: 10.5056/jnm18125 (PMC6474711; doi:10.5056/jnm18125), 2019-04-30
Supplement: JNM-25-222_suppl.pdf [file JNM-25-222_suppl.pdf]

**Supplementary Table 1.** Food Items Included in the Korean Food Frequency Questionnaire and Their Categorization According to Association With Worsened Irritable Bowel Syndrome Symptoms

| Food types        | Rarely problematic food items (n = 64)                                                                                                               | Problematic food items (n = 55)                                                                                                                                                                                                                                                                                                                                                           |
|-------------------|------------------------------------------------------------------------------------------------------------------------------------------------------|-------------------------------------------------------------------------------------------------------------------------------------------------------------------------------------------------------------------------------------------------------------------------------------------------------------------------------------------------------------------------------------------|
| Grains            | Gimbap, powder of roasted grains, potato                                                                                                             | <sup>a</sup> Bread, <sup>a</sup> black bean-sauce noodles/Chinese-style noodles with vegetables and seafood, <sup>a</sup> noodle soup, <sup>a</sup> dumplings, <sup>a</sup> instant ramen, <sup>a</sup> pizza/hamburger, <sup>a</sup> pasta, white rice, multigrain rice, rice with beans, brown rice, stir-fried rice cake/rice-cake soup, cereal, rice cake, sweet potato/sweet pumpkin |
| Meat              | Cooked seasoning beef, pork cutlet, braised spicy chicken                                                                                            | <sup>a</sup> Pork belly, <sup>a</sup> tripe, <sup>a</sup> beef soup, <sup>a</sup> processed meat, grilled meat, roasted ribs, sweet and sour pork, boiled meat, grilled duck, chicken soup                                                                                                                                                                                                |
| Eggs              | Egg/quail egg (whole egg), egg white, egg yolk                                                                                                       | NA                                                                                                                                                                                                                                                                                                                                                                                        |
| Seafood           | White fish, eel, loach soup, sliced raw fish, anchovy, oyster/shellfish, canned fish, salted seafood                                                 | External blue colored fish, squid/octopus, shrimp/crab, fish cake                                                                                                                                                                                                                                                                                                                         |
| Pulses            | Beans, fermented-beans, soybean paste                                                                                                                | Tofu, soybean milk                                                                                                                                                                                                                                                                                                                                                                        |
| Vegetables        | Carrot, paprika, garlic, onions, broccoli, zucchini, eggplant, cabbage, bean sprouts, radish, bracken, burdock/lotus root, balloon flower, mushrooms | Cauliflower/lettuce, sesame leaf, cucumber, chili, green-leaf vegetables                                                                                                                                                                                                                                                                                                                  |
| Seaweed           | Laver                                                                                                                                                | Sea mustard/kelp                                                                                                                                                                                                                                                                                                                                                                          |
| Kimchi            | Kimchi stew, radish kimchi, other kimchis                                                                                                            | Cabbage kimchi                                                                                                                                                                                                                                                                                                                                                                            |
| Fruits            | Blueberry, orange, pear, persimmon, banana, grape, peach/plum, tomato                                                                                | <sup>a</sup> Apple, strawberry, watermelon, melon                                                                                                                                                                                                                                                                                                                                         |
| Dairy products    | Low/zero fat milk                                                                                                                                    | <sup>a</sup> Whole milk, <sup>a</sup> yogurt, <sup>a</sup> sweetened fermented milk, <sup>a</sup> ice cream, fermented milk, cheese                                                                                                                                                                                                                                                       |
| Monosaccharose    | Honey/jam/syrup                                                                                                                                      | Candy, chocolate                                                                                                                                                                                                                                                                                                                                                                          |
| Sweet foods       | NA                                                                                                                                                   | Cookies, sweet bread                                                                                                                                                                                                                                                                                                                                                                      |
| Tea and beverages | Coffee with cream, coffee with sugar, mixtures of instant coffee, soda, other teas, fruit juice                                                      | Brewed coffee, green tea                                                                                                                                                                                                                                                                                                                                                                  |
| Nuts              | NA                                                                                                                                                   | Nuts                                                                                                                                                                                                                                                                                                                                                                                      |
| Fat and oils      | Oils, mayonnaise, butter/margarine                                                                                                                   | NA                                                                                                                                                                                                                                                                                                                                                                                        |
| Liquor            | Korean distilled liquor (soju), beer, whiskey, refined rice wine, wine, raw rice wine                                                                | NA                                                                                                                                                                                                                                                                                                                                                                                        |

Pearson's chi-square or fisher's exact test was used to examine the differences between controls and patients with irritable bowel syndrome; if  $P < 0.05$ , the food item is classified as problematic ( $^aP < 0.001$ ).

**Supplementary Table 2.** Food Groups of Korean Food Items According to Potentially-symptom-causing Contents

| Food groups                              | Food items                                                                                                                                                                                                                                                                         |
|------------------------------------------|------------------------------------------------------------------------------------------------------------------------------------------------------------------------------------------------------------------------------------------------------------------------------------|
| High-FODMAP foods<br>(36 items)          | Rice with beans, tofu, beans, fermented-beans, soybean paste, soybean milk, cauliflower, garlic, onions, mushrooms, apple, pear, persimmon, watermelon, plum, honey, soda, fruit juice, nuts, gluten foods <sup>a</sup> , dairy products <sup>a</sup>                              |
| High-fat foods<br>(17 items)             | Black bean-sauce noodles/Chinese-style noodles with vegetables and seafood, instant ramen, pizza/hamburger, pasta, grilled meat, roasted ribs, pork belly, tripe, beef soup, pork cutlet, sweet and sour pork, boiled meat, processed meat, roast duck, eel, loach soup, fish cake |
| Gluten foods <sup>a</sup><br>(10 items)  | Bread, black bean-sauce noodles/Chinese-style noodles with vegetables and seafood, noodle soup, dumplings, instant ramen, pizza/hamburger, pasta, cereal, cookies, sweet bread                                                                                                     |
| Dairy products <sup>a</sup><br>(7 items) | Whole milk, low/zero fat milk, yogurt, sweetened fermented milk, fermented milk, ice cream, cheese                                                                                                                                                                                 |
| Caffeine<br>(7 items)                    | Chocolate, brewed coffee, coffee with cream, coffee with sugar, mixtures of instant coffee, green tea, soda                                                                                                                                                                        |
| Alcohol<br>(6 items)                     | Korean distilled liquor (soju), beer, whiskey, refined rice wine, wine, raw rice wine                                                                                                                                                                                              |

<sup>a</sup>All gluten foods and dairy products were included in the high-FODMAP foods group.  
FODMAP, fermentable oligo-, di-, mono-saccharides, and polyols.
